# Supplementary material
Source: PubMed Central journal article supplement (PMC2643262)
Supplement: supp_35_4_415__1.pdf [file supp_35_4_415__1.pdf]

**Strain Differences Influence Murine Pulmonary Responses to**  
*Stachybotrys chartarum*

Jamie H. Rosenblum Lichtenstein, Ramon M. Molina, Thomas C. Donaghey,  
and Joseph D. Brain

Department of Environmental Health, Harvard School of Public Health, Boston,  
Massachusetts, U.S.A.

Online Data Supplement

to *American Journal of Respiratory Cell and Molecular Biology*, Vol 35, pp 415-423, 2006

## **MATERIALS AND METHODS**

### **Intratracheal Instillation**

The mice were weighed and anesthetized with up to 5% vaporized Halothane (Halocarbons Lab, Inc., North Augusta, SC). They were then placed on a slanted board where they were supported by an elastic band under the upper incisors. A suspension of *S. chartarum* spores was instilled intratracheally at 0.25 ml/100 gm body weight. The spore suspension was delivered to the lungs through the trachea with a ball-tip 22-gauge needle inserted between the vocal cords. A microscope lamp shining on the neck provided transillumination of the larynx. Each animal remained in the slanted position for approximately 1 minute, and then was placed on its back in the cage where it regained consciousness within a few minutes.

### **Bronchoalveolar Lavage (BAL)**

The trachea was carefully exposed and cannulated. The lung was lavaged *in situ* with 12 washes of sterile 0.9% saline using one ml of saline for the first lavage, then 0.75 ml for subsequent washes. Washes 1 and 2 were used for biochemical assays. Cells were separated from the supernatant in all washes (350g at 4°C for 10 minutes). The supernatant fraction of washes 1-2 was clarified by sedimentation at 14,500g for 30 minutes and used to assay various enzymes and albumin determination.

### **Analysis of Bronchoalveolar Lavage**

The total leukocyte cell count in the lavage fluid was estimated in a hemocytometer chamber at 250X magnification. Leukocytes were identified by size and granularity. The

leukocytes were deposited onto a microscope slide by cytopspin (72g for 5 min), fixed, stained, and mounted in Permount. Macrophages, PMNs, eosinophils and lymphocytes in the BAL cell pellet were differentiated by light microscopy at 400X. The supernatant was analyzed for lactic dehydrogenase, myeloperoxidase and albumin by spectrophotometry. Hemoglobin analysis was performed on the combined cell pellet from all 12 lavages. Biochemical analyses were performed according to Beck (48).

**Table E1** – \*p<0.05 \*\*p<0.01 \*\*\*p<0.005 Chart showing mean ± SEM (p-value) of all factors measured in a MAP analysis of bronchoalveolar lavage fluid after instillation of 10 million spores *S. chartarum*/ml (2.5 ml/kg body weight). Percent of baseline is calculated by dividing the mean value after instillation with spores by the mean value after instillation with saline for each mouse strain. † KC percent of baseline calculated based on the least detectable dose of 0.035 ng/ml; SGOT percent of baseline calculated based on the least detectable dose of 0.37 µg/ml.

**Table E1. MAP Analysis of Cytokines and Chemokines in BAL Fluid (Online Supplement Only)**

|                                                           | C57BL/6J          |                    | BALB/c            |                     | Percent of Baseline |         |
|-----------------------------------------------------------|-------------------|--------------------|-------------------|---------------------|---------------------|---------|
|                                                           | Saline            | Spores             | Saline            | Spores              | C57BL/6J            | BALB/c  |
| <b>CYTOKINES</b>                                          |                   |                    |                   |                     |                     |         |
| Interferon- $\gamma$ (IFN- $\gamma$ ) (pg/ml)             | 18.38 $\pm$ 0.634 | 16.16 $\pm$ 2.867  | 17.03 $\pm$ 0.853 | 16.8 $\pm$ 3.09     | 88%                 | 99%     |
| Interleukin -1 $\alpha$ (IL-1 $\alpha$ ) (pg/ml)          | 12.18 $\pm$ 0.471 | 12.68 $\pm$ 1.323  | 11.72 $\pm$ 0.966 | 28.26 $\pm$ 8.445*  | 104%                | 241%*   |
| Interleukin-1 $\beta$ (IL-1 $\beta$ ) (ng/ml)             | 0.06 $\pm$ 0.005  | 0.05 $\pm$ 0.006   | 0.04 $\pm$ 0.001  | 0.07 $\pm$ 0.014*** | 83%                 | 175%*** |
| Interleukin-2 (IL-2) (pg/ml)                              | 22.44 $\pm$ 1.541 | 19.94 $\pm$ 2.591  | 19.8 $\pm$ 1.53   | 17.9 $\pm$ 3.548    | 89%                 | 90%     |
| Interleukin-3 (IL-3) (pg/ml)                              | 4.62 $\pm$ 0.205  | 4.31 $\pm$ 0.784   | 4.32 $\pm$ 0.462  | 7.26 $\pm$ 1.639*   | 93%                 | 176%*   |
| Interleukin-4 (IL-4) (pg/ml)                              | 30.46 $\pm$ 1.314 | 28.76 $\pm$ 2.768  | 29.58 $\pm$ 0.894 | 29.52 $\pm$ 5.419   | 106%                | 100%    |
| Interleukin-5 (IL-5) (ng/ml)                              | 0.02 $\pm$ 0.001  | 0.02 $\pm$ 0.004   | 0.02 $\pm$ 0.002  | 0.03 $\pm$ 0.005    | 100%                | 150%    |
| Interleukin-6 (IL-6) (pg/ml)                              | 5.6 $\pm$ 0.708   | 4.83 $\pm$ 0.515   | 5.26 $\pm$ 0.332  | 28.68 $\pm$ 10.657* | 116%                | 545%*   |
| Interleukin-7 (IL-7) (ng/ml)                              | 0.08 $\pm$ 0.002  | 0.07 $\pm$ 0.014   | 0.07 $\pm$ 0.003  | 0.07 $\pm$ 0.013    | 87.5%               | 100%    |
| Interleukin-10 (IL-10) (pg/ml)                            | 144.4 $\pm$ 2.561 | 132.34 $\pm$ 28.96 | 155.5 $\pm$ 8.18  | 196.6 $\pm$ 39.781  | 92%                 | 126%    |
| Interleukin-11 (IL-11) (pg/ml)                            | 28.6 $\pm$ 0.694  | 24.58 $\pm$ 4.928  | 25.43 $\pm$ 1.102 | 33.44 $\pm$ 6.436   | 86%                 | 131%    |
| Interleukin-12/p70 (IL-12/p70) (ng/ml)                    | 0.25 $\pm$ 0.01   | 0.26 $\pm$ 0.034   | 0.22 $\pm$ 0.013  | 0.22 $\pm$ 0.043    | 104%                | 100%    |
| Interleukin-17 (IL-17) (ng/ml)                            | 0.03 $\pm$ 0.001  | 0.02 $\pm$ 0.003   | 0.02 $\pm$ 0.002  | 0.02 $\pm$ 0.005    | 66%                 | 100%    |
| Interleukin-18 (IL-18) (ng/ml)                            | 0.11 $\pm$ 0.007  | 0.10 $\pm$ 0.007   | 0.10 $\pm$ 0.001  | 0.19 $\pm$ 0.051*   | 91%                 | 190%*   |
| Interferon- $\gamma$ Inducible Protein-10 (IP-10) (pg/ml) | 16.02 $\pm$ 0.646 | 14.92 $\pm$ 1.406  | 17.05 $\pm$ 1.508 | 23.2 $\pm$ 5.2      | 93%                 | 136%    |
| Leukemia Inhibitory Factor (LIF) (pg/ml)                  | 17.1 $\pm$ 0.898  | 14.23 $\pm$ 2.257  | 15.53 $\pm$ 0.993 | 33.94 $\pm$ 8.585*  | 83%                 | 219%*   |
| Macrophage Colony Stimulating Factor (M-CSF) (ng/ml)      | 0.05 $\pm$ 0.004  | 0.06 $\pm$ 0.011   | 0.06 $\pm$ 0.004  | 0.15 $\pm$ 0.047*   | 120%                | 250%*   |

|                                                                                   | C57BL/6J          |                    | BALB/c            |                      | Percent of Baseline |                     |
|-----------------------------------------------------------------------------------|-------------------|--------------------|-------------------|----------------------|---------------------|---------------------|
|                                                                                   | Saline            | Spores             | Saline            | Spores               | C57BL/6J            | BALB/c              |
| Tumor Necrosis Factor- $\alpha$ (TNF $\alpha$ ) (ng/ml)                           | 0.1 $\pm$ 0.004   | 0.09 $\pm$ 0.013   | 0.09 $\pm$ 0.006  | 0.7 $\pm$ 0.263**    | 90%                 | 778%**              |
|                                                                                   |                   |                    |                   |                      |                     |                     |
| <b>CHEMOKINES</b>                                                                 |                   |                    |                   |                      |                     |                     |
| Eotaxin (pg/ml)                                                                   | 12.18 $\pm$ 0.529 | 11.93 $\pm$ 0.695  | 11.5 $\pm$ 0.704  | 13.92 $\pm$ 2.848    | 98%                 | 121%                |
| Granulocyte Chemotactic Protein-2/LPS-induced CXC Chemokine (GCP-2 / LIX) (ng/ml) | 0.05 $\pm$ 0.015  | 0.07 $\pm$ 0.037   | 0.07 $\pm$ 0.012  | 0.12 $\pm$ 0.035     | 140%                | 171%                |
| Granulocyte Macrophage Colony Stimulating Factor (GM-CSF) (pg/ml)                 | 7.11 $\pm$ 0.446  | 6.97 $\pm$ 1.032   | 6.77 $\pm$ 0.479  | 7.89 $\pm$ 2.411     | 98%                 | 117%                |
| Mouse Homolog of Human Growth Related Protein (KC/GRO $\alpha$ ) (ng/ml)          | 0 $\pm$ 0         | 0 $\pm$ 0          | 0 $\pm$ 0         | 0.37 $\pm$ 0.123*    | N/A                 | 1057%* <sup>†</sup> |
| Lymphotactin (pg/ml)                                                              | 38.2 $\pm$ 1.117  | 33.7 $\pm$ 6.246   | 33.0 $\pm$ 2.209  | 31.36 $\pm$ 6.005    | 88%                 | 95%                 |
| Monocyte Chemotactic Protein-1 (MCP-1 / JE) (pg/ml)                               | 11.64 $\pm$ 0.53  | 10.29 $\pm$ 1.496  | 10.61 $\pm$ 0.484 | 63.03 $\pm$ 25.713*  | 88%                 | 594%*               |
| Monocyte Chemotactic Protein-3 (MCP-3) (pg/ml)                                    | 14.14 $\pm$ 0.312 | 12.69 $\pm$ 1.627  | 12.98 $\pm$ 0.309 | 37.22 $\pm$ 12.642*  | 90%                 | 287%*               |
| Monocyte Chemotactic Protein-5 (MCP-5) (pg/ml)                                    | 17.98 $\pm$ 1.117 | 14.59 $\pm$ 2.467  | 16.23 $\pm$ 1.183 | 17.18 $\pm$ 3.153    | 81%                 | 106%                |
| Macrophage Derived Chemokine (MDC) (pg/ml)                                        | 22.8 $\pm$ 2.119  | 20.96 $\pm$ 0.79   | 20.25 $\pm$ 0.846 | 48.12 $\pm$ 17.119   | 92%                 | 238%                |
| Macrophage Inflammatory Protein -1 $\alpha$ (MIP-1 $\alpha$ ) (ng/ml)             | 0.03 $\pm$ 0.003  | 0.03 $\pm$ 0.004   | 0.03 $\pm$ 0.001  | 0.09 $\pm$ 0.03*     | 100%                | 300%*               |
| Macrophage Inflammatory Protein -1 $\beta$ (MIP-1 $\beta$ ) (pg/ml)               | 94.5 $\pm$ 3.182  | 75.52 $\pm$ 12.536 | 83.05 $\pm$ 3.988 | 399.52 $\pm$ 140.48* | 80%                 | 481%*               |
| Macrophage Inflammatory Protein -1 $\gamma$ (MIP-1 $\gamma$ ) (ng/ml)             | 0.1 $\pm$ 0.037   | 0.09 $\pm$ 0.036   | 0.11 $\pm$ 0.032  | 0.94 $\pm$ 0.383*    | 90%                 | 855%*               |
| Macrophage Inflammatory Protein -2 (MIP-2) (pg/ml)                                | 11.5 $\pm$ 1.301  | 10.84 $\pm$ 1.661  | 11.77 $\pm$ 1.168 | 134.14 $\pm$ 58.812* | 94%                 | 1139%*              |
| Macrophage Inflammatory Protein -3 $\beta$ (MIP-3 $\beta$ ) (ng/ml)               | 0.08 $\pm$ 0.003  | 0.08 $\pm$ 0.012   | 0.08 $\pm$ 0.002  | 0.1 $\pm$ 0.021      | 100%                | 125%                |
| Regulated Upon Activation, Normal T-cell Expressed and Secreted (RANTES) (pg/ml)  | 2.09 $\pm$ 0.383  | 1.89 $\pm$ 0.376   | 2.07 $\pm$ 0.453  | 8.45 $\pm$ 3.474*    | 90%                 | 408%*               |
|                                                                                   |                   |                    |                   |                      |                     |                     |
| <b>OTHER PROTEINS</b>                                                             |                   |                    |                   |                      |                     |                     |

|                                                            | C57BL/6J      |               | BALB/c       |               | Percent of Baseline |                   |
|------------------------------------------------------------|---------------|---------------|--------------|---------------|---------------------|-------------------|
|                                                            | Saline        | Spores        | Saline       | Spores        | C57BL/6J            | BALB/c            |
| Apolipoprotein A1 (µg/ml)                                  | 0.04 ± 0.009  | 0.37 ± 0.394  | 0.1 ± 0.068  | 1.96 ± 0.977  | 925%                | 1960%             |
| C Reactive Protein (µg/ml)                                 | 0.01 ± 0.001  | 0.01 ± 0.006  | 0.01 ± 0.001 | 0.02 ± 0.008  | 100%                | 200%              |
| Endothelin-1 (pg/ml)                                       | 8.66 ± 0.096  | 7.74 ± 1.052  | 8.07 ± 0.163 | 7.08 ± 1.385  | 89%                 | 88%               |
| Epidermal Growth Factor (EGF) (pg/ml)                      | 7.33 ± 0.394  | 6.99 ± 0.888  | 5.9 ± 0.414  | 5.4 ± 1.204   | 95%                 | 91%               |
| Factor VII (ng/ml)                                         | 0.19 ± 0.012  | 0.16 ± 0.024  | 0.18 ± 0.016 | 0.26 ± 0.055  | 84%                 | 144%              |
| Fibrinogen (µg/ml)                                         | 0.09 ± 0.011  | 0.42 ± 0.375  | 0.26 ± 0.06  | 1.66 ± 0.85   | 466%                | 638%              |
| Fibroblast Growth Factor-9 (FGF-9) (ng/ml)                 | 0.23 ± 0.007  | 0.22 ± 0.041  | 0.24 ± 0.014 | 0.27 ± 0.053  | 96%                 | 112%              |
| Fibroblast Growth Factor-basic (FGF-basic) (ng/ml)         | 0.48 ± 0.008  | 0.45 ± 0.09   | 0.41 ± 0.017 | 0.38 ± 0.077  | 94%                 | 93%               |
| Growth Hormone (ng/ml)                                     | 0 ± 0         | 0 ± 0         | 0 ± 0        | 0 ± 0         | N/A                 | N/A               |
| GST (ng/ml)                                                | 0.61 ± 0.048  | 0.58 ± 0.087  | 0.54 ± 0.022 | 0.48 ± 0.104  | 95%                 | 89%               |
| Haptoglobin (µg/ml)                                        | 0.34 ± 0.019  | 0.38 ± 0.067  | 0.34 ± 0.029 | 0.45 ± 0.096  | 112%                | 132%              |
| Immunoglobulin A (IgA) (µg/ml)                             | 0.02 ± 0.002  | 0.05 ± 0.029  | 0.04 ± 0.005 | 0.24 ± 0.116  | 250%                | 600%              |
| Insulin (µIU/ml)                                           | 1.32 ± 0.055  | 1.21 ± 0.16   | 1.16 ± 0.037 | 1.5 ± 0.29    | 92%                 | 129%              |
| Leptin (ng/ml)                                             | 0.04 ± 0.001  | 0.03 ± 0.004  | 0.03 ± 0.002 | 0.03 ± 0.005  | 75%                 | 100%              |
| Myoglobin (ng/ml)                                          | 0.57 ± 0.06   | 6.13 ± 4.444  | 3.06 ± 0.737 | 1.98 ± 0.755  | 1075%               | 65%               |
| Oncostatin-M (OSM) (ng/ml)                                 | 0.08 ± 0.002  | 0.07 ± 0.011  | 0.07 ± 0.003 | 0.07 ± 0.013  | 88%                 | 100%              |
| Serum Glutamic Oxaloacetic Transaminase (SGOT) (µg/ml)     | 0 ± 0         | 0.21 ± 0      | 0 ± 0        | 0.41 ± 0.26   | N/A                 | 111% <sup>†</sup> |
| Stem Cell Factor (SCF) (pg/ml)                             | 40.24 ± 2.782 | 31.82 ± 4.656 | 34.9 ± 2.86  | 35.52 ± 6.761 | 79%                 | 102%              |
| Thrombopoietin (TPO) (ng/ml)                               | 0.58 ± 0.062  | 0.63 ± 0.123  | 0.54 ± 0.048 | 0.93 ± 0.235  | 109%                | 172%              |
| Tissue Inhibitors of Metalloproteinases-1 (TIMP-1) (ng/ml) | 0.13 ± 0.013  | 0.12 ± 0.007  | 0.2 ± 0.02   | 0.99 ± 0.446* | 93%                 | 495%*             |

|                                                    | C57BL/6J     |               | BALB/c         |                | Percent of Baseline |        |
|----------------------------------------------------|--------------|---------------|----------------|----------------|---------------------|--------|
|                                                    | Saline       | Spores        | Saline         | Spores         | C57BL/6J            | BALB/c |
| Tissue Factor (ng/ml)                              | 0.10 ± 0.008 | 0.12 ± 0.031  | 0.12 ± 0.017   | 0.27 ± 0.07*   | 120%                | 225%*  |
| Vascular Cell Adhesion Molecule-1 (VCAM-1) (ng/ml) | 1.43 ± 0.167 | 3.36 ± 2.31   | 1.7 ± 0.167    | 6.73 ± 2.878   | 235%                | 396%   |
| Vascular Endothelial Growth Factor (VEGF) (pg/ml)  | 84.8 ± 5.644 | 84.6 ± 14.496 | 104.98 ± 5.951 | 147.6 ± 38.368 | 100%                | 140%   |
| von Willebrand Factor (ng/ml)                      | 2.94 ± 0.25  | 2.67 ± 0.478  | 3.01 ± 0.21    | 2.92 ± 0.624   | 91%                 | 97%    |
